# Supplementary material for: Aggregation of cryopreserved mid-hindgut endoderm for more reliable and reproducible hPSC-derived small intestinal organoid generation
Source: PubMed Central journal article supplement — Stem Cell Reports. 2022 Jul 28;17(8):1889–902. doi: 10.1016/j.stemcr.2022.06.011 (PMC9391520; doi:10.1016/j.stemcr.2022.06.011), 2022-07-28
Supplement: mmc1.pdf [file mmc1.pdf]

**Supplemental Information**

**Aggregation of cryopreserved mid-hindgut endoderm for more reliable and reproducible hPSC-derived small intestinal organoid generation**

**Amy L. Pitstick, Holly M. Poling, Nambirajan Sundaram, Phillip L. Lewis, Daniel O. Kechele, J. Guillermo Sanchez, Melissa A. Scott, Taylor R. Broda, Michael A. Helmrich, James M. Wells, and Christopher N. Mayhew**

Figure S1, related to Figure 1

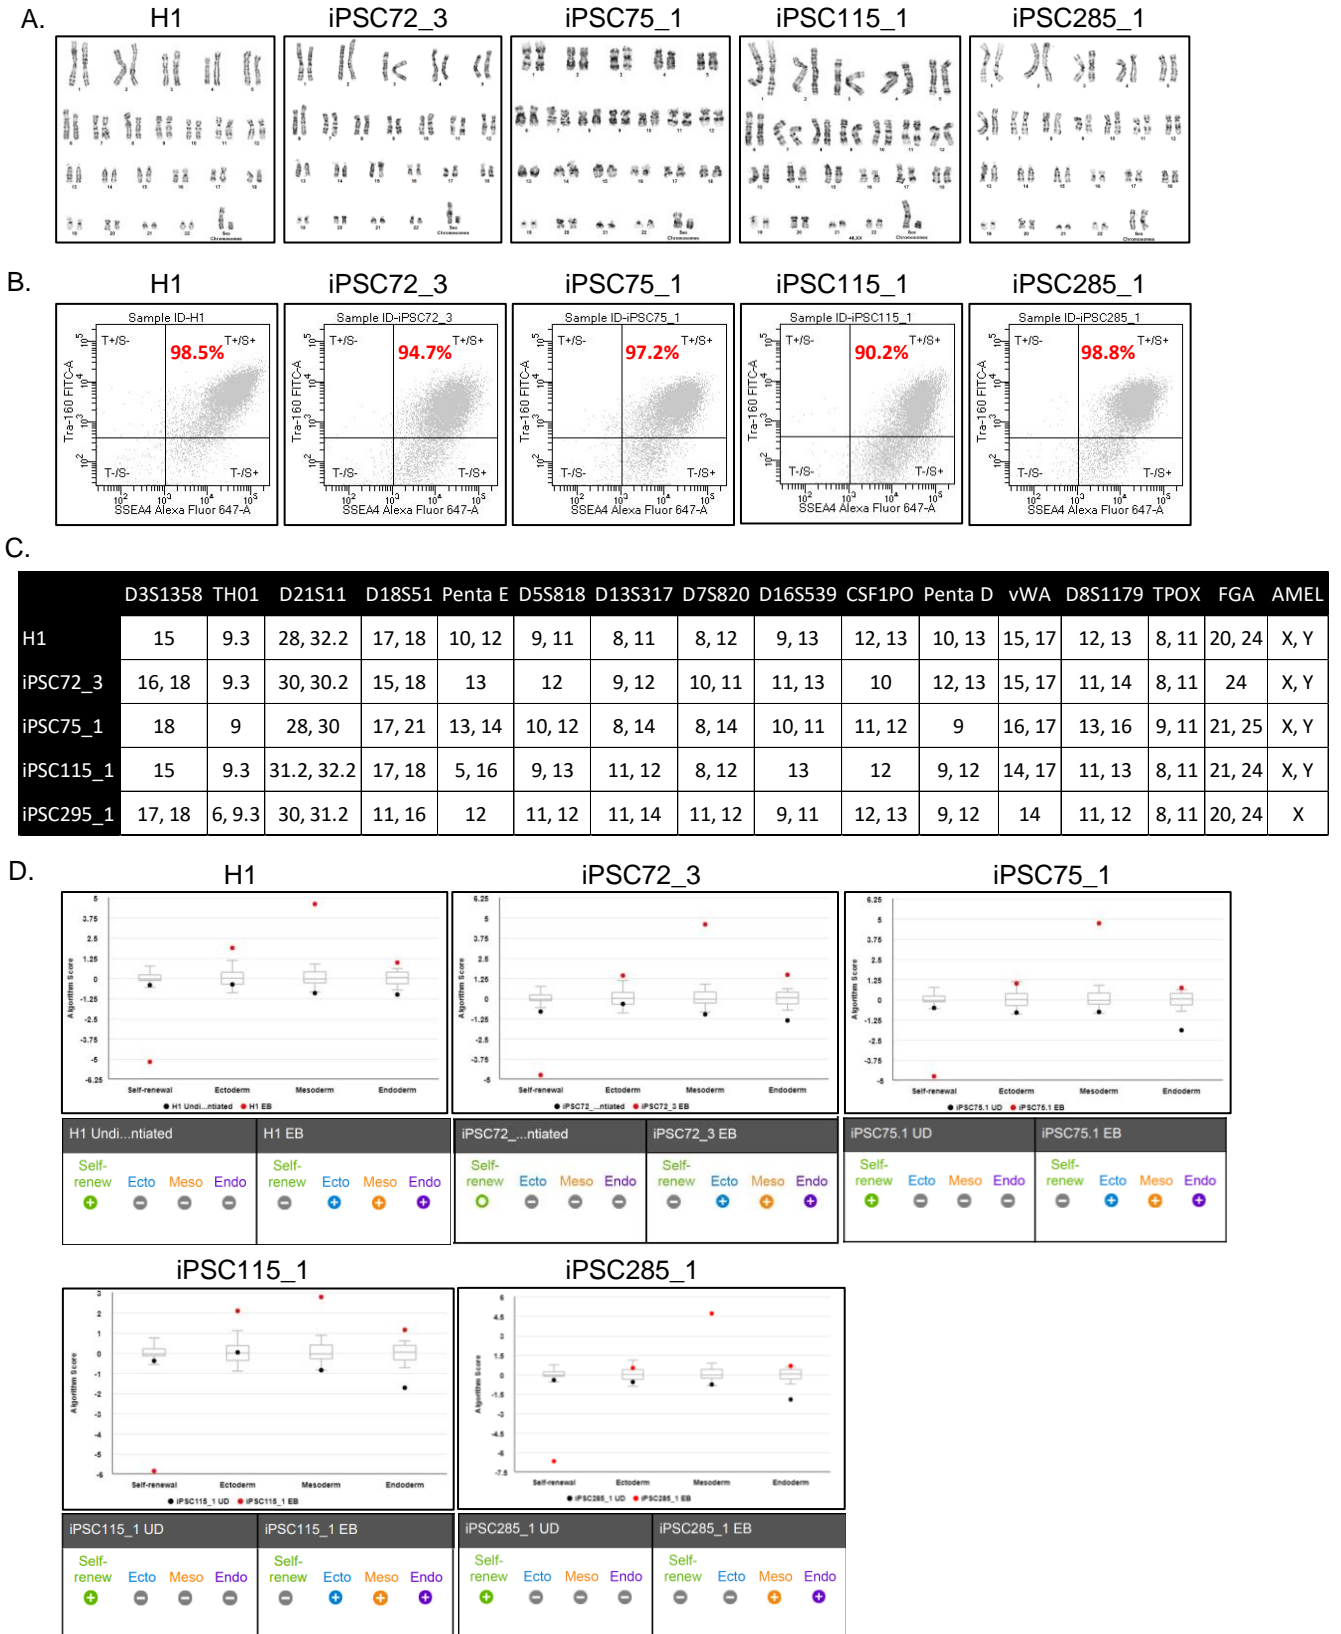

Figure S2, related to Figures 1 and 5

A.

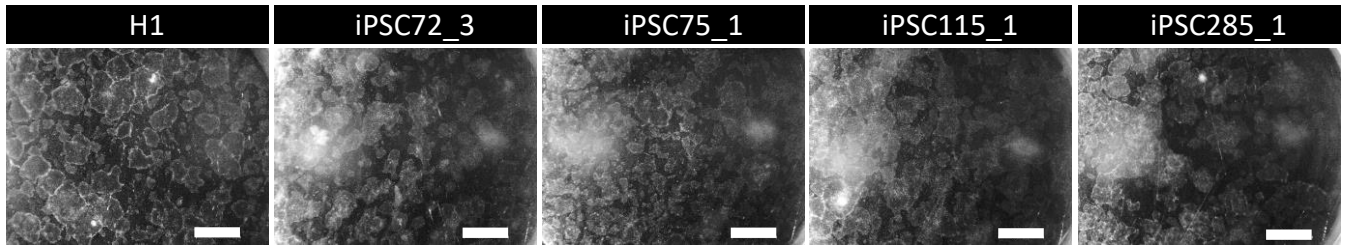

B.

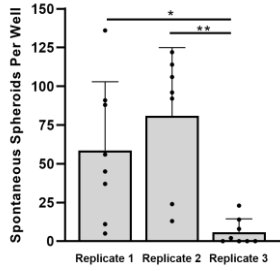

C.

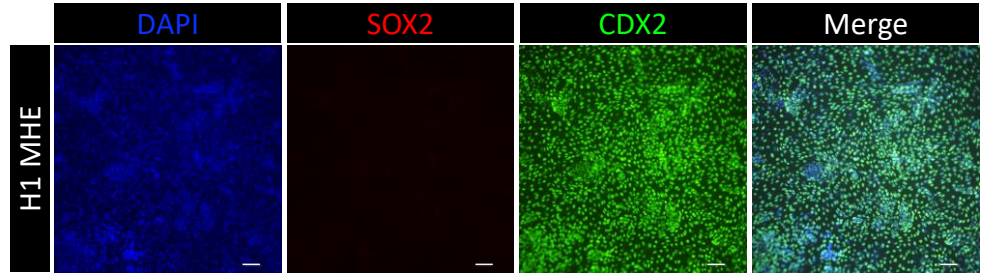

D.

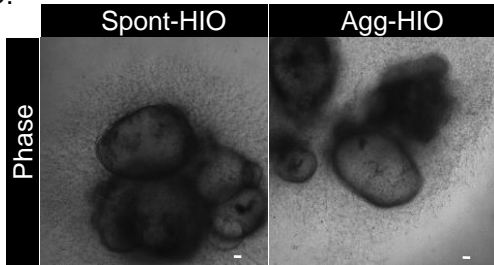

E.

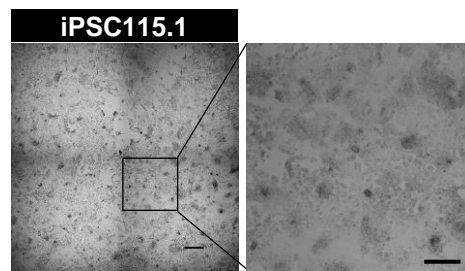

F.

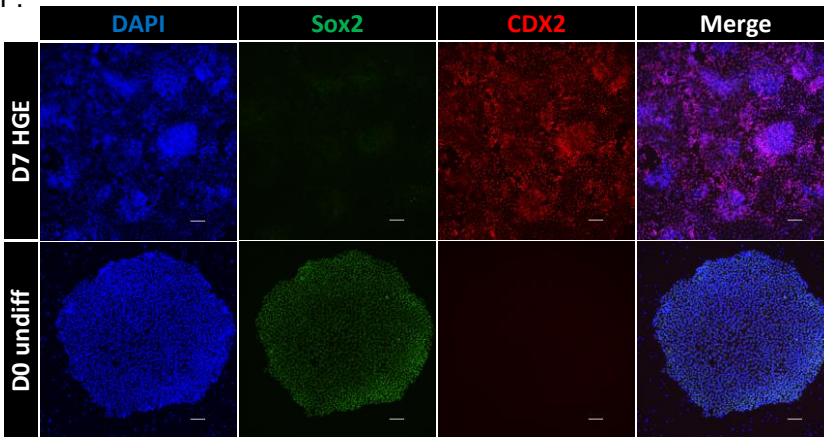

G.

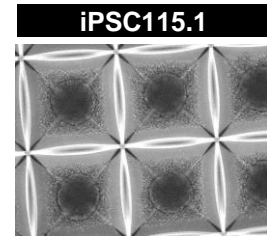

H.

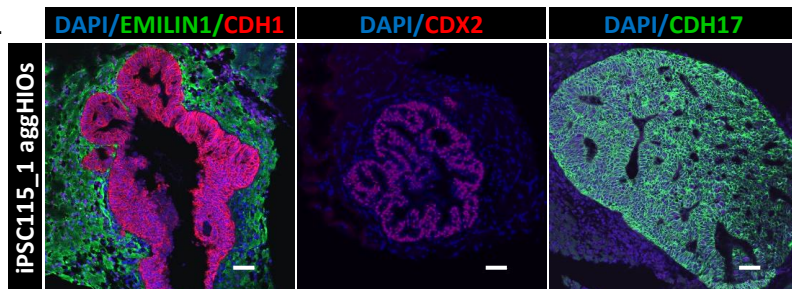

Figure S3. related to Figure 3

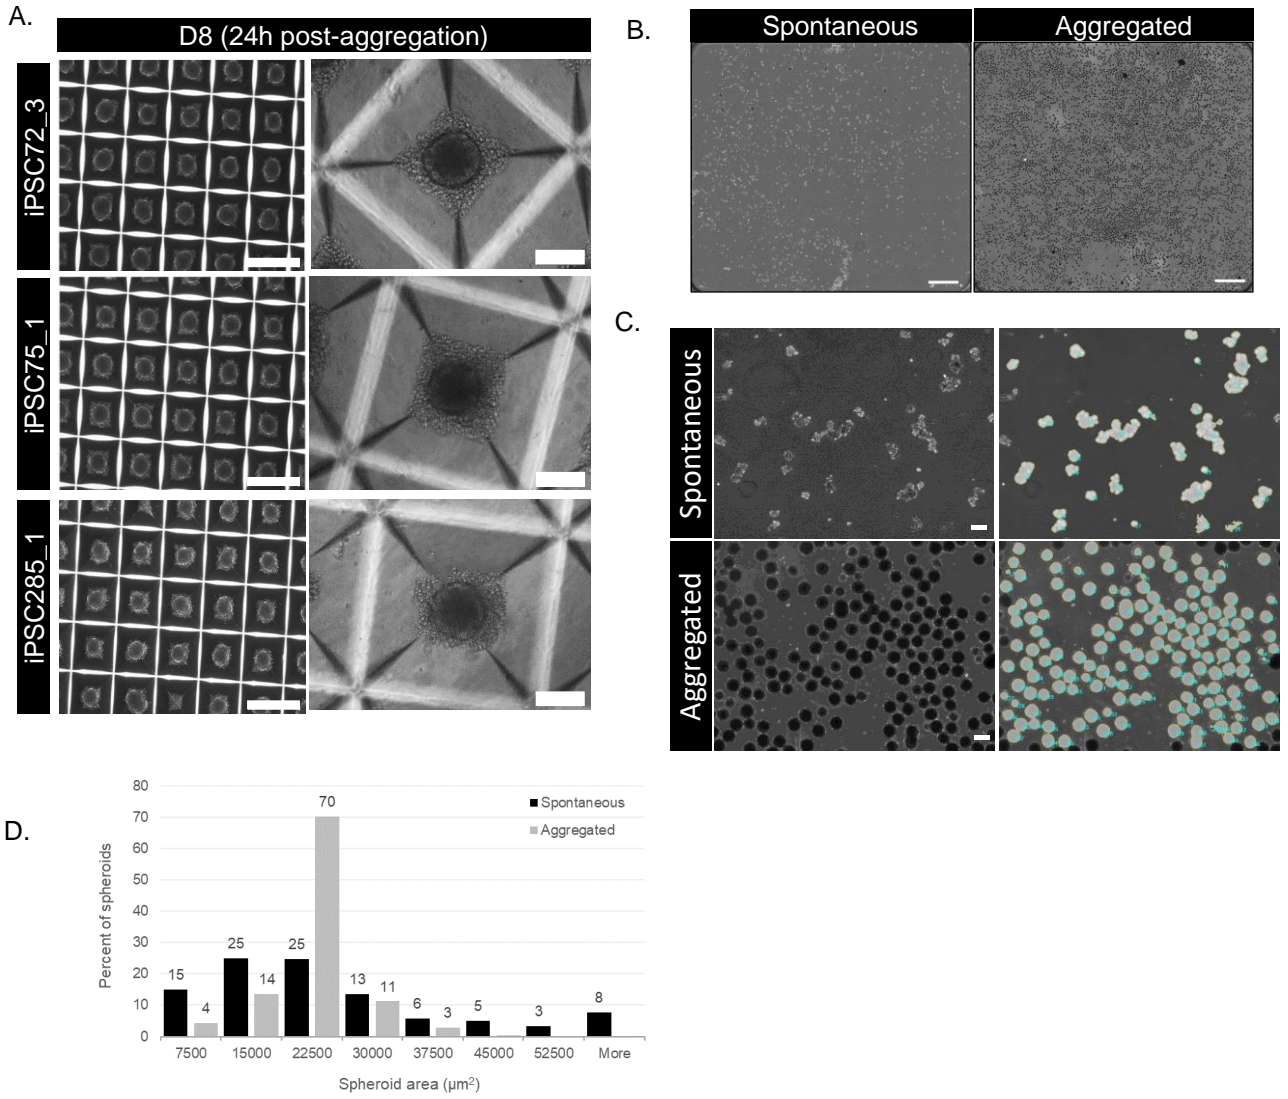



Figure S4, related to Figures 4 and 5

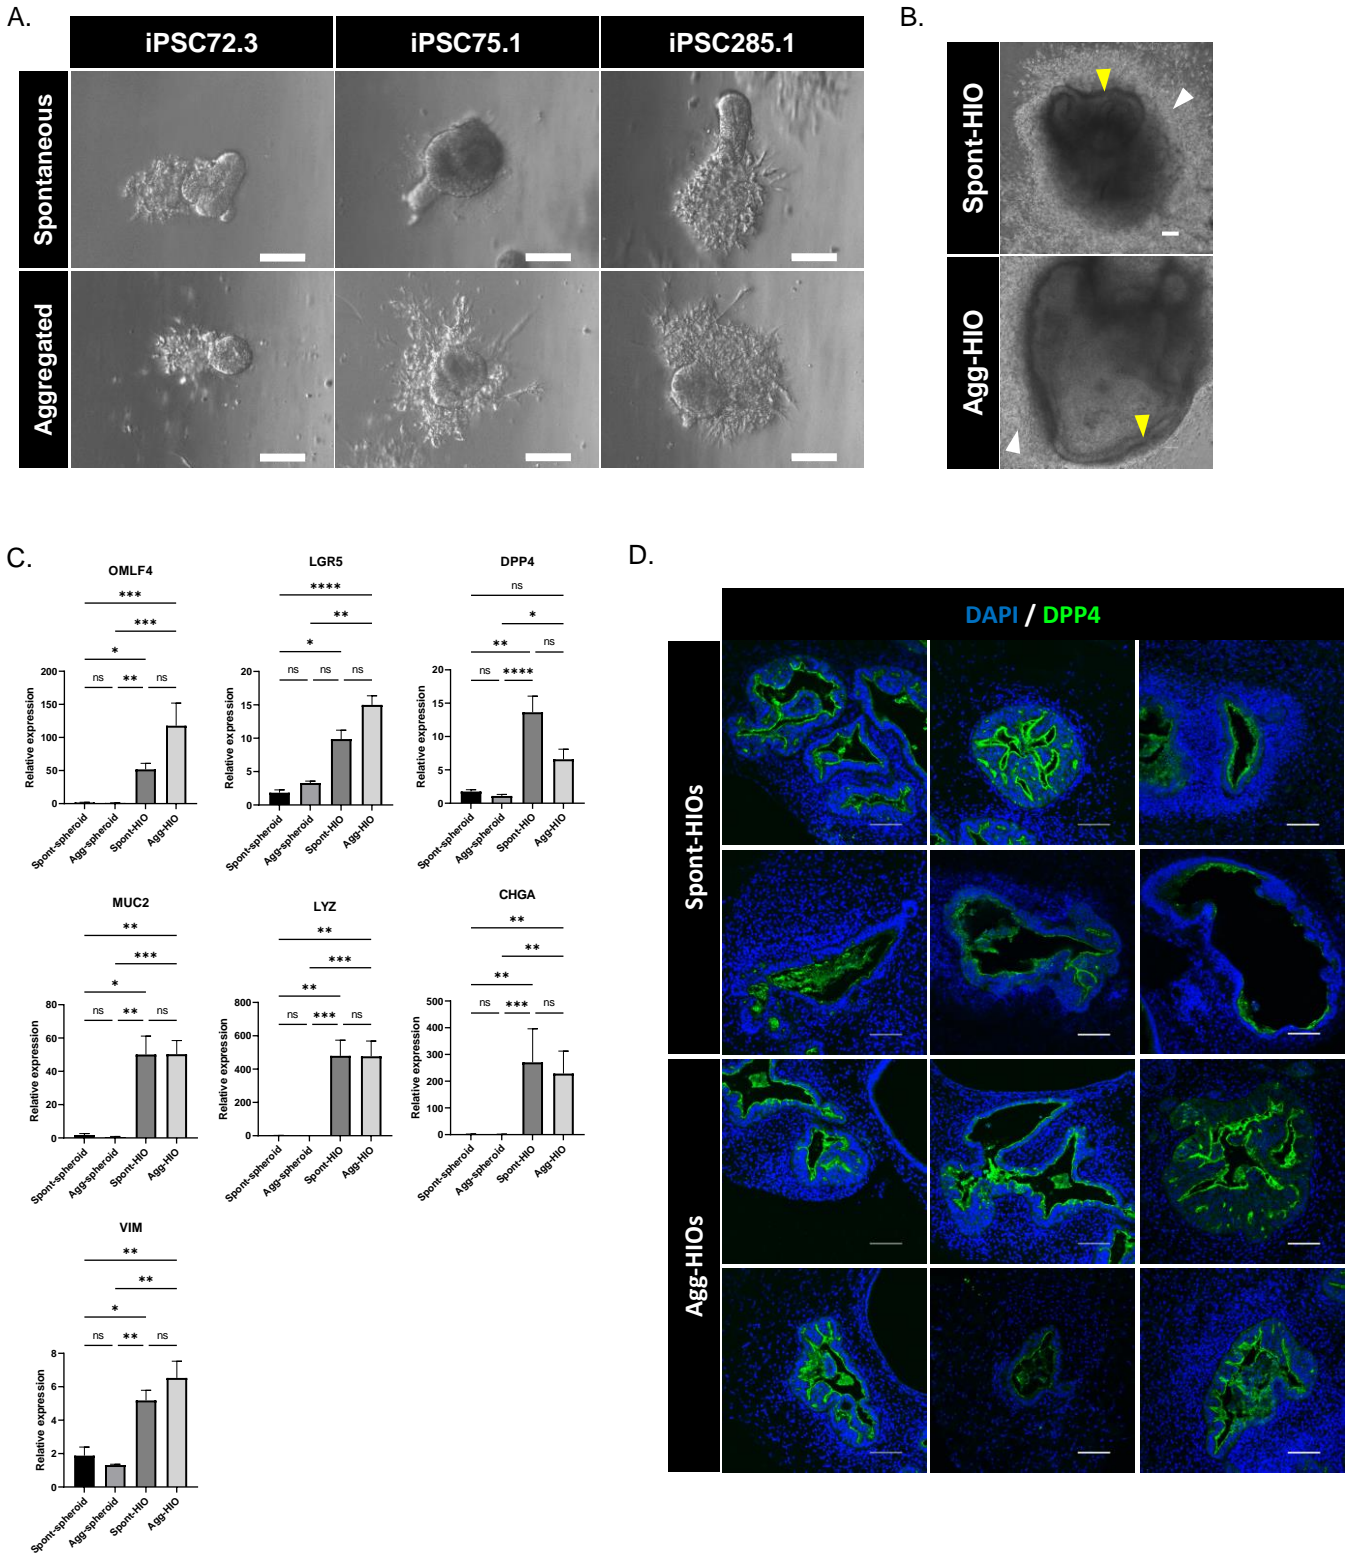

Figure S5, related to Figure 5

A.

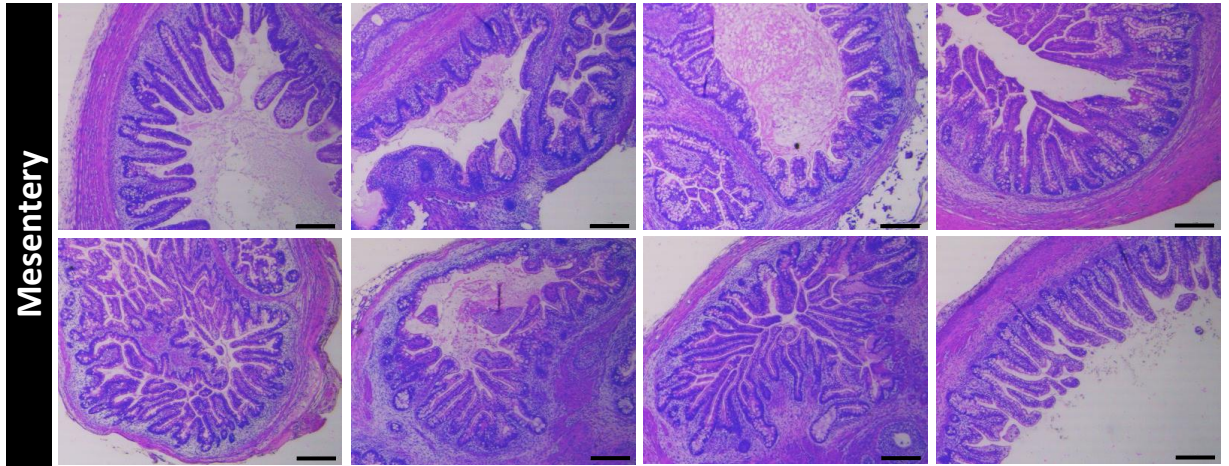

B.

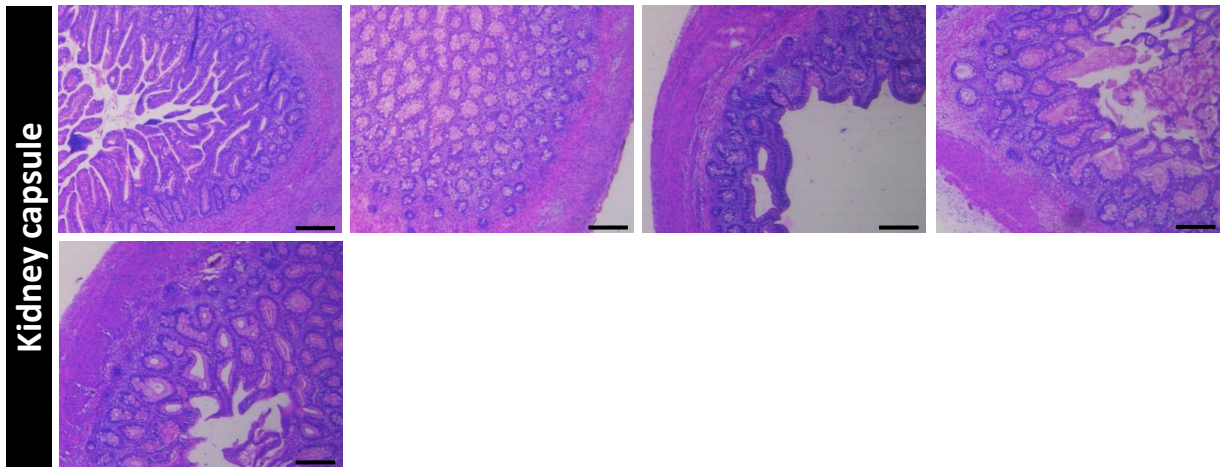

C.

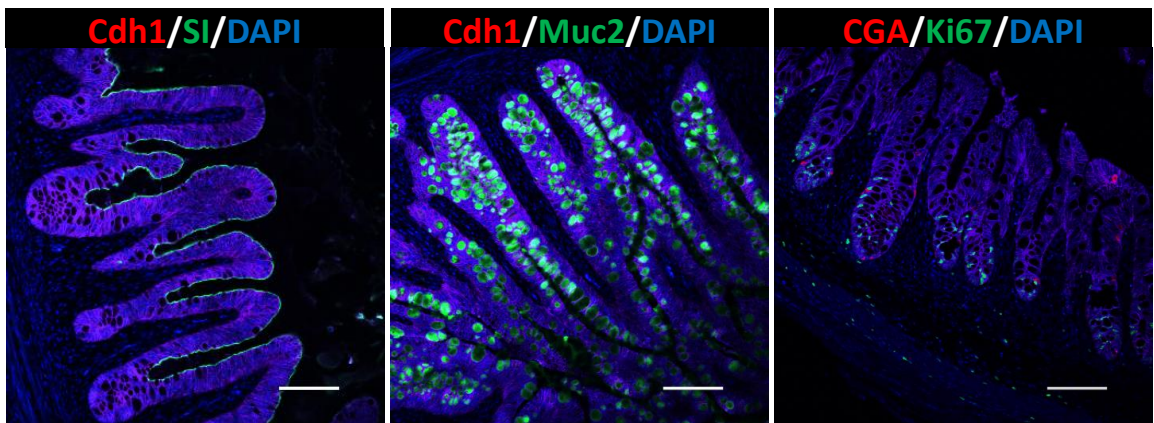





Figure S7. related to Figure 7

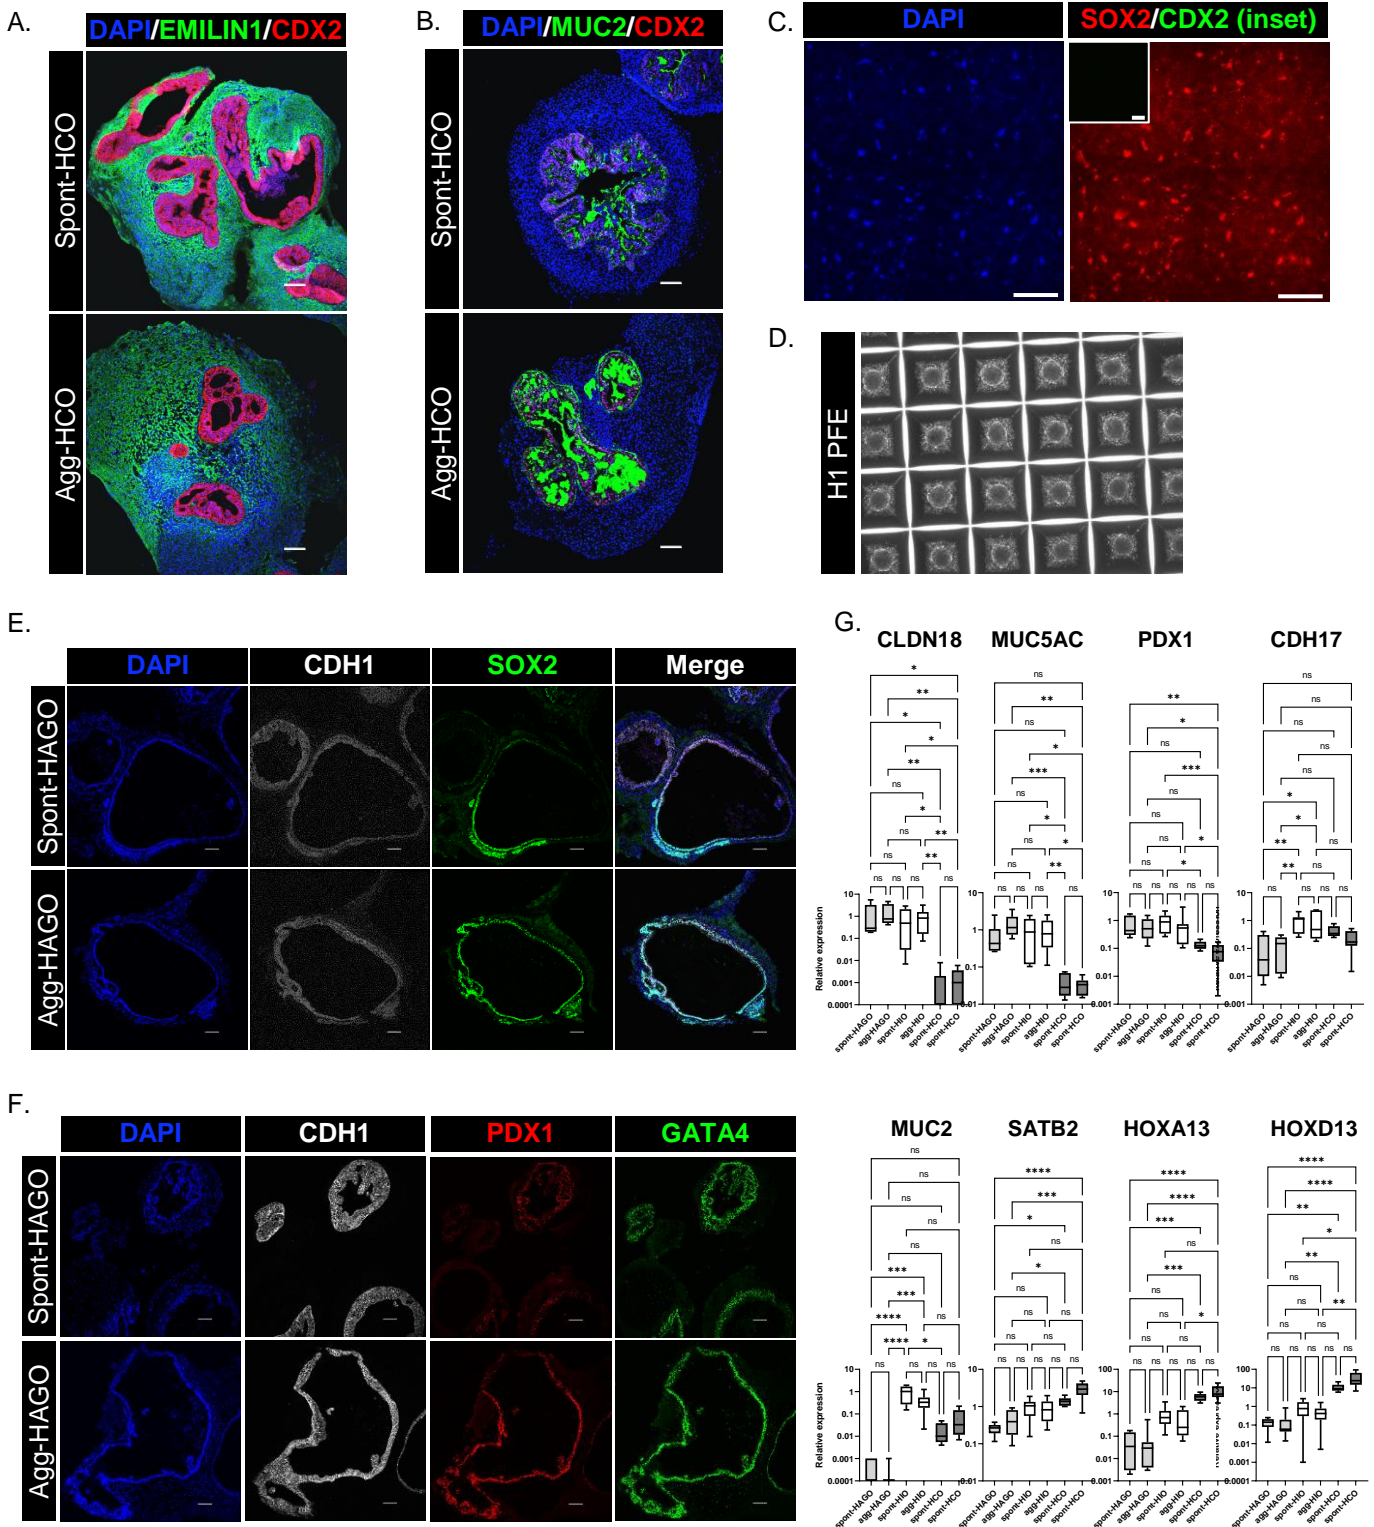



## Supplemental Figure Legends

### Supplemental Figure 1

Quality control analysis of hPSCs used in this study. Cryopreserved working banks of all hPSCs lines (H1, iPSC72\_3, iPSC75\_1, iPSC115\_1, and iPSC285\_1) were simultaneously generated and subjected to quality control assessment before use in the study. Following thaw, cells were maintained in culture for a maximum of 20 passages before being discarded and a new vial thawed.

(A) Karyotype analysis: standard metaphase spreads and G-banded karyotype were processed and interpreted by the CCHMC cytogenetics core.

(B) Stemness marker analysis: hPSC cultures were co-stained with FITC-conjugated anti-Tra-1-60 and Alexa Fluor-conjugated anti-SSEA4 antibodies and analyzed by flow cytometry. Negative (T-/S-), Tra1-60+ (T+/S-), SSEA4+ (T-/S+), and double positive (T+/S+) populations are shown.

(C) Cell line identity authentication assessment by STR: DNA from H1 hESCs, donor cells used to make iPSC lines used in the study, and iPSCs was subjected to STR analysis of 16 genetic loci. STR profile of donor cells matched STR profile of derived iPSCs.

(D) Analysis of functional pluripotency of hPSC lines used in the study. Total RNA was harvested from undifferentiated hPSCs and D14 embryoid bodies (EB) derived from each line and subject to Scorecard assay. The Scorecard assay identifies germ layer-specific differentiation potential *in vitro* by quantifying the expression of 94 defined self-renewal, ectodermal, mesodermal, endodermal genes by Taqman qRT-PCR in undifferentiated and embryoid body samples (Tsankov *et al.*, 2015). Expression data from each line is uploaded to a proprietary cloud-based data analysis tool which generates an algorithm score (top panel) and

an overall assessment of trilineage potential (bottom panel) for each line. Top panel: The algorithm score permits assessment of the change in expression of lineage-specific genes during EB differentiation as well as comparison to the expression of those genes in 13 undifferentiated reference hPSC lines. Bottom panel: a [+] icon for a given germ layer indicates that the expression profile predicts differentiation potential for that germ layer, [o] indicates borderline ability to differentiate into that germ layer, and [-] indicates that a line may not be optimal for differentiating into that germ layer. Importantly, whilst endoderm scores for each line used in this study indicate different levels of endoderm potential, our data demonstrate that differences in Scorecard algorithm scores do not correlate to the ability of a given line to form uniformly CDX2+ MHE.

## Supplemental Figure 2

(A) Undifferentiated H1, iPSC72-3, iPSC75\_1, iPSC115\_1 and iPSC285\_1 cells were plated at equivalent seeding density for MHE generation and HIO production (McCracken *et al.*, 2011).

Scale bar = 2 mm.

(B) A single cell suspension of undifferentiated H1 was plated at  $1.5 \times 10^5$  cells/well of a 24-well plate for MHE generation. The number of detached spont-spheroids per well for each experiment was quantified. N=3 experiments, \*p=0.032, \*\*p=0.002.

(C) D7 MHE derived from H1s plated as single cells was fixed and immunostained with antibodies to the MHE marker CDX2 (green) and counterstained with DAPI. = 100 $\mu$ m.

(D) Representative images of the gross morphology of H1-derived spont- and agg-HIOs at day 35. Scale bar = 500 $\mu$ m.

(E) iPSC115\_1 cells were differentiated to d7 MHE and exhibited poor morphogenesis and no spontaneous spheroid detachment. MHE was aggregated and embedded in Matrigel on day 8

Pitstick *et al.*

for HIO generation. Tiled image of a representative region on the d7 MHE morphology showing poor MHE morphogenesis and no detached spont-spheroids. Scale bar = 500 $\mu$ m.

(F) iPSC115\_1 MHE monolayers were fixed and immunostained with antibodies to MHE marker CDX2 and foregut endoderm marker SOX2. Undifferentiated iPSC115\_1 cells served as CDX2<sup>-</sup>/SOX2<sup>+</sup> controls. Cells were counterstained with DAPI. Scale bar = 100 $\mu$ m.

(G) Image showing aggregation of iPSC115\_1 derived MHE ~16 hours after plating in an Aggrewell 400 plate.

(H) Day 35 iPSC115\_1 agg-spheroid-derived HIOs were fixed, embedded in paraffin and sectioned. Sections were subjected to immunostaining with antibodies to CDX2 and CDH17 (intestinal epithelia) and Emilin1 (mesenchyme). Scale bars = 200 $\mu$ m.

### **Supplemental Figure 3**

(A) Three iPSC lines were differentiated to MHE and after collection of spont-spheroids, the MHE monolayer was aggregated. Resulting day 8 aggregates were imaged 16 hours later. Left panel scale bar = 500 $\mu$ m. Right panel scale bar = 100 $\mu$ m.

(B) H1 cells were differentiated to MHE and detached spont-spheroids from all wells were collected. The remaining monolayer was then aggregated and collected. All collected spont- and agg-spheroids were plated in separate wells of a 2-well cell culture chamber slide and images were captured on a Keyence model BZ-X710. Images were tiled to show the complete imaged area of each chamber slide. Scale bar = 2.5 mm.

(C) Calculation of spont- and agg-spheroid area. Keyence BZ-X800 Analyzer software was used to count and define the perimeter of each spheroid not touching the edge of each frame from each frame captured in Fig. S4B. The perimeter was then used to calculate the area of each



Pitstick *et al.*

spheroid. Left: representative example of a single captured image of spont- and agg-spheroids. Scale bar = 100 $\mu$ m. Right: the same frame showing the count (cyan) and area (gray) of each spheroid generated by the BZ-X800 Analyzer software.

(D) Comparison of spont- and agg-spheroid area consistency. Spheroid area ( $\mu$ m<sup>2</sup>) was calculated as described in Fig. S4C and the percentage of total spont-spheroids (black) and agg-spheroids (gray) with an area within each range is shown.

#### **Supplemental Figure 4**

(A) Spont-spheroids and Agg-spheroids were generated from iPSC72\_3, iPSC75\_1 and iPSC285\_1 and embedded in Matrigel. Representative images of gross morphology were captured after 3 days culture in Matrigel. Scale bar = 100 $\mu$ m.

(B) Spont- and agg-spheroids were generated from H1 hESCs. On day 28 representative images of gross organoid morphology were captured. Scale bar = 200 $\mu$ m.

(C) Total RNA was isolated from H1-derived d7 spont- and d8 agg-spheroids, and spont- and agg-HIOs. Taqman qRT-PCR was used to assess the expression of intestinal differentiation markers. Relative expression indicates fold-change vs. spont-spheroid. Data is expressed as mean  $\pm$  SEM (n=3 experiments, 3 wells each \*P<0.05 \*\*p<0.01, \*\*\*p<0.001, NS = not significant).

(D) Sections from H1-derived spont- and agg-HIOs were stained with DPP4 antibodies and counterstained with DAPI. Representative epithelial DPP4 expression is shown. Scale bar = 100 $\mu$ m.

#### **Supplemental Figure 5**

Pitstick *et al.*

Day 35 agg-HIOs were transplanted to the mesentery and kidney capsule of immunodeficient NSG mice.

(A) Agg-HIOs transplanted to the mesentery were harvested after 62 days for analysis. Organoids were fixed, embedded in paraffin, sectioned and subject to H&E staining. Representative sections of each engrafted organoid are shown. Scale bars = 200 $\mu$ m.

(B) Agg-HIOs transplanted to the kidney capsule were harvested after 83 days for analysis. Organoids were fixed, embedded in paraffin, sectioned and subject to H&E staining. Representative sections of each engrafted organoid are shown. Scale bars = 200 $\mu$ m.

(C) Sections from agg-HIOs transplanted to the mesentery were immunostained for intestinal epithelial markers SI (enterocyte), MUC2 (goblet cells), and CHGA (enteroendocrine cells). Proliferative cells were also detected by immunostaining for KI67. Scale bars = 100 $\mu$ m.

### **Supplemental Figure 6**

HIOs were generated from MHE that was processed to single cells, cryopreserved, and then aggregated (CryoAgg-HIO).

(A) Control spont- and agg-spheroids were cultured in HIO media containing NOGGIN. Agg-spheroids generated from cryopreserved MHE were cultured in HIO media either containing [+] or lacking [-] NOGGIN. Sections of day 35 organoids were immunostained with antibodies to CDH17 and CDX2 and counterstained with DAPI. Representative images are shown. Scale bars = 50 $\mu$ m.

(B) Representative morphology of developing HIOs generated from control aggregated MHE (top) and following cryopreservation, thaw, and aggregation (bottom).

Pitstick *et al.*

(C) Representative images of H1, iPSC72\_3 and iPSC75\_1-derived Agg- and cryoAgg-HIOs (d35). Scale bar = 500 $\mu$ m.

(D) Randomly selected Agg- or cryoAgg-HIO sections were imaged and the lumen area of each organoid measured using Nikon Elements software by manually defining the area of each lumen. Two Way ANOVA with Tukey's Post Hoc analysis was used to assess statistical significance. N=3 experiments, NS = not significant.

### **Supplemental Figure 7**

Generation of colonic and antral gastric organoids by aggregation of patterned endoderm progenitors.

(A) Posteriorized MHE aggregates generate organoids (Agg-HCO) containing epithelial and mesenchymal layers. H1-derived MHE spont- and agg-spheroids were patterned to posterior hindgut MHE-derived spont- and agg-spheroids were exposed to BMP2 (Munera *et al.*, 2017) and cultured to day 35. Sections were co-immunostained with antibodies to CDH1 (epithelia) and Emilin1 (mesenchyme). Scale bar = 100 $\mu$ m.

(B) Agg-HCOs contain intestinal epithelia and goblet cells. Day 35 agg-HCOs were immunostained with antibodies to CDX2 (intestinal epithelia) and MUC2 (goblet cells). Scale bar = 100 $\mu$ m.

(C) Generation of SOX<sup>+</sup>/CDX2<sup>-</sup> foregut endoderm. H1-derived DE was patterned to posterior foregut endoderm (PFE) (McCracken *et al.*, 2014) and co-immunostained for the foregut marker SOX2 and hindgut marker CDX2. Cells were counterstained with DAPI. Four tiled images from adjacent, randomly selected fields are shown. Scale bar = 1 mm.

(D) Aggregate formation from posterior foregut endoderm (PFE) monolayers. H1-derived PFE was harvested to single cells by exposure to accutase and aggregated in Aggrewell 400 plates.



Pitstick *et al.*

A representative image of uniform PFE aggregates formed 16 hours after plating is shown.

Scale bar = 500 $\mu$ m.

(E) PFE aggregates generate organoids (Agg-HAGO) containing foregut epithelia. Spontaneous PFE spheroids and PFE aggregates were embedded in Matrigel and cultured to day 33.

Sections of organoids were immunostained to identify foregut epithelia (CDH1<sup>+</sup>/SOX2<sup>+</sup>). Scale bar = 100 $\mu$ m.

(F) Agg-HAGO epithelia has posterior foregut identity. Sections from day 35 spont- and agg-HAGO organoids were co-immunostained with antibodies to epithelia (CDH1) and the posterior foregut markers PDX1 and GATA4. Sections were counterstained with DAPI. Scale bar = 100 $\mu$ m.

(G) Expression of gut segment specific markers was assessed by qRT-PCR in D35 spont- and agg-HAGOs, -HIOs, and -HCOs. Expression of each gene was normalized to HIO-spont (n=3 experiments, 3 wells each; \*p< 0.05, \*\*p< 0.01, \*\*\*p<0.001, \*\*\*\*p<0.0001).

## Supplemental Tables

**Table S1: Antibodies used in this study.**

| Primary antibodies  | Vendor         | Catalog #     | Dilution |
|---------------------|----------------|---------------|----------|
| Mouse anti-CDH1     | BD Biosciences | 610182        | 1:500    |
| Mouse anti-CDH1     | Abnova         | PAB12286      | 1:500    |
| Goat anti-CDH1      | R&D Systems    | AF648         | 1:500    |
| Rabbit anti-CDH17   | Sigma          | HPA023616     | 1:500    |
| Rabbit anti-CDX2    | Cell Marque    | 235R-14       | 1:500    |
| Mouse anti-CDX2     | Biogenix       | Mu392A-UC     | 1:500    |
| Mouse anti-CHGA     | Abnova         | H00009545-A01 | 1:500    |
| Mouse anti-CHGA     | DHSB           | CPTC-CHGA-3   | 1:500    |
| Rabbit anti-CLDN18  | Atlas          | HPA018446     | 1:500    |
| Goat anti-DPP4      | R&D Systems    | AF954         | 1:200    |
| Rabbit anti-Emilin1 | Atlas          | A116271       | 1:400    |
| Goat anti-FOXF1     | R&D Systems    | AF4798        | 1:500    |

|                                   |               |                  |                 |
|-----------------------------------|---------------|------------------|-----------------|
| Rabbit anti-GATA4                 | Santa Cruz    | sc-9053          | 1:500           |
| Rabbit anti-Ki67                  | Abnova        | PAB20694         | 1:300           |
| Rabbit anti-MUC2                  | Abcam         | ab134119         | 1:1250          |
| Mouse anti-MUC5AC                 | Abcam         | Ab3649           | 1:250           |
| Goat anti-PDX1                    | Abcam         | 47383            | 1:100           |
| Rabbit anti-SATB2                 | Cell Marque   | 384-R15          | 1:100           |
| Goat anti-SOX2                    | Santa Cruz    | sc-17320         | 1:500           |
| Mouse anti-SSEA4-alexafluor 647   | Biolegend     | 330407           | 1:40            |
| Rabbit anti-Sucrose Isomaltase    | Atlas         | HPA011897        | 1:1000          |
| Mouse anti-Tra-1-60-FITC          | BD Pharmingen | 560876           | 1:20            |
| <b>Secondary antibodies</b>       | <b>Vendor</b> | <b>Catalog #</b> | <b>Dilution</b> |
| Alexafluor donkey anti-goat 488   | ThermoFisher  | A-11055          | 1:1000          |
| Alexafluor donkey anti-goat 568   | ThermoFisher  | A-11057          | 1:1000          |
| Alexafluor donkey anti-goat 647   | ThermoFisher  | A-21447          | 1:1000          |
| Alexafluor donkey anti-mouse 488  | ThermoFisher  | A-21202          | 1:1000          |
| Alexafluor donkey anti-mouse 568  | ThermoFisher  | A-10037          | 1:1000          |
| Alexafluor donkey anti-mouse 647  | ThermoFisher  | A-31571          | 1:1000          |
| Alexafluor donkey anti-rabbit 488 | ThermoFisher  | A-21206          | 1:1000          |
| Alexafluor donkey anti-rabbit 568 | ThermoFisher  | A-10042          | 1:1000          |
| Alexafluor donkey anti-rabbit 647 | ThermoFisher  | A-31573          | 1:1000          |

**Table S2: Taqman probes used in this study.**

| Gene  | Gene Name                                                   | Gene ID | TaqMAN #      | Accession #    |
|-------|-------------------------------------------------------------|---------|---------------|----------------|
| ACTB  | Beta-actin                                                  | 60      | Hs01060665_g1 | NM_001101.3    |
| CHGA  | Chromogranin A                                              | 1113    | Hs00900375_m1 | NM_001275.3    |
| DPPIV | Dipeptidylpeptidase 4                                       | 1803    | Hs00175210_m1 | NM_001935.3    |
| LGR5  | Leucine Rich Repeat Containing G Protein-Coupled Receptor 5 | 8549    | Hs00969422_m1 | NM_001277226.1 |
| LYZ   | Lysozyme                                                    | 4069    | Hs00426232_m1 | NM_000239.2    |
| MUC2  | Mucin 2                                                     | 4583    | Hs03005103_g1 | NM_002457.2    |
| OLFM4 | Olfactomedin 4                                              | 10562   | Hs00197437_m1 | NM_006418.4    |
| VIM   | Vimentin                                                    | 7431    | Hs00185584    | NM_003380.3    |

**Supplemental References**

McCracken et al., 2011. Generating human intestinal tissue from pluripotent stem cells in vitro.

Nat Protoc 6, 1920-1928. 10.1038/nprot.2011.410.

Pitstick *et al.*

McCracken et al., 2014. Modelling human development and disease in pluripotent stem-cell-derived gastric organoids. *Nature* 516, 400-404. 10.1038/nature13863.

Munera et al., 2017. Differentiation of Human Pluripotent Stem Cells into Colonic Organoids via Transient Activation of BMP Signaling. *Cell Stem Cell* 21, 51-64 e56.  
10.1016/j.stem.2017.05.020.

Tsankov et al., 2015. A qPCR ScoreCard quantifies the differentiation potential of human pluripotent stem cells. *Nat Biotechnol* 33, 1182-1192. 10.1038/nbt.3387.
